# Supplementary material
Source: publisher site journal article supplement (https://www.dovepress.com/article/517695)
Supplement: Supplementary file 1 [file 517695-Supplementary-Material.docx]

**Supplementary Content**

**Supplementary Material 1:** Expert consultation questionnaire for a training course on traditional Chinese medicine health preservation during pregnancy and perinatal period for maternity nurses 1-18

**Part I** Questionnaire of basic information of experts 2

**Part Ⅱ** Expert consultation questionnaire for training course on traditional Chinese medicine health preservation during pregnancy and perinatal period for maternity nurses

Table S1.1 3-4

Table S1.2 4-5

Table S1.3 5-17

**Part Ⅲ** Expert authority questionnaire 17-18

**Supplementary Material 2:** Consultation result of traditional Chinese medicine health preservation during pregnancy and perinatal period training course for maternity nurses

19-24

**Supplementary Material 1: Expert consultation questionnaire for a training course on traditional Chinese medicine health preservation during pregnancy and perinatal period for maternity nurses**

Dear Experts,

Hello! In order to construct a traditional Chinese medicine maternal health preservation during pregnancy and perinatal period for maternity nurses, we designed the expert consultation form based on the theoretical framework of "competency theory", group discussion and literature review to clarify further and refine the training content of TCM maternal health care and fetal care. This study aims to develop and explore a suitable curriculum system for maternity nurses to learn the theory and technology of traditional Chinese medicine in pregnancy and childbirth.

In order to ensure the accuracy and efficiency of the questionnaire, please take the time to complete the questionnaire item by item according to the instructions. We sincerely look forward to your comments and suggestions on this study! We will follow the principle of informed consent and voluntary and keep your views strictly confidential.

Thank you very much for your vital support for this letter inquiry! I sincerely wish you good health, smooth work and a happy life.

Contact person: XXX

Tel: XXX

E-mail: XXX

Advisor:XXX

**Part I Questionnaire of basic information of experts**

1.Your gender: □ male □ female

2.Your age: □30-39 years old □40-49 years old □50-59 years old □>60 years old

3.Your major: ________

4.Your highest education: □ Bachelor's degree □ Master's degree □ Doctor's degree

5.Your professional positions: □ Associate-senior level □ Senior level

6.Major areas of expertise: □ Traditional Chinese medicine □ Obstetrics □ midwifery □ nursing

7.Working place: □ General hospital □ Specialized hospital □ Colleges and universities

8.The number of years you have been engaged in this major: ________

9.Your contact information:

Email ___________________

Telephone ___________________

**Part Ⅱ Expert consultation questionnaire for training course on traditional Chinese medicine health preservation during pregnancy and perinatal period for maternity nurses**

**Instructions to fill in the form:** Please rate the importance of all levels of indicators, and the importance is 5 grades: 1= not important, 2= not very important, 3= generally important, 4= relatively important, and 5= very important. Please tick "√" in the corresponding space (only select one answer for each item); if you think there is a need to add items, please fill in your opinion in the "suggested items" column and give the importance score; please fill in the corresponding training method for the secondary indicators, please add the correlation score and fill in the reference hours for the tertiary indicators; If you think the statement is incorrect or need to be deleted, please fill in the specific comments in the "modification comments" column. If you disagree with the training method and class hours, please fill in the training method and class hours that you think are appropriate in the modification comments and note the reasons. One class hour is 45 minutes.

Table S1.1 Expert consultation table for first-level indicators of training course on traditional Chinese medicine health preservation during pregnancy and perinatal period for maternity nurses

| First-level indicators | Score of importance | | | | | Suggestions for modification |
| --- | --- | --- | --- | --- | --- | --- |
| 5 | 4 | 3 | 2 | 1 |  |
| A. Basic professional knowledge |  |  |  |  |  |  |
| B. Professional core knowledge |  |  |  |  |  |  |
| C. Professional skill |  |  |  |  |  |  |
| D. Professional development |  |  |  |  |  |  |
| Suggested items (please give importance rating) : | | | | | | |
|  |  |  |  |  |  |  |
|  |  |  |  |  |  |  |

For Table S1.1, if you have any other comments or suggestions, please fill in here:

__________________________________________________________________________________________________________________________________________

Table S1.2 Expert consultation table for secondary indicators of training course on traditional Chinese medicine health preservation during pregnancy and perinatal period for maternity nurses

| First-level indicators | Secondary indicators | Score of importance | | | | | Suggestions for modification |
| --- | --- | --- | --- | --- | --- | --- | --- |
| 5 | 4 | 3 | 2 | 1 |  |
| A. Basic professional knowledge | A1. Introduction of TCM 's participation in maternal health care and fetal care |  |  |  |  |  |  |
| A2. Basic theory of traditional Chinese medicine |  |  |  |  |  |  |
| A3. Dialectical nursing |  |  |  |  |  |  |
| A4. The quality control of TCM technology and management |  |  |  |  |  |  |
| Suggested items (please give importance rating) : | | | | | | |
| B. Professional core knowledge | B1. Body Nurturing for Conception |  |  |  |  |  |  |
| B2. Pregnancy |  |  |  |  |  |  |
| B3. Delivery |  |  |  |  |  |  |
| B4. Postpartum |  |  |  |  |  |  |
| B5. The common symptoms of pregnancy |  |  |  |  |  |  |
| B6. Dystocia |  |  |  |  |  |  |
| B7. Postpartum symptoms |  |  |  |  |  |  |
| B8. Application and evaluation of TCM nursing programs in obstetrics |  |  |  |  |  |  |
| Suggested items (please give importance rating) : | | | | | | |
| C. Professional skill | C1. Application status and prospect of appropriate technology of traditional Chinese medicine nursing in obstetrics |  |  |  |  |  |  |
| C2. Commonly used traditional Chinese medicine technology |  |  |  |  |  |  |
| C3. Thinking and skills training |  |  |  |  |  |  |
| Suggested items (please give importance rating) : | | | | | | |
| D. Professional development | D1. Professional role |  |  |  |  |  |  |
| D2. Humanistic quality |  |  |  |  |  |  |
| D3. Legal ethics |  |  |  |  |  |  |
| Suggested items (please give importance rating) : | | | | | | |

For Table S1.2, if you have any other comments or suggestions, please fill in here:

__________________________________________________________________________________________________________________________________________

Table S1.3 Expert consultation table for secondary indicators of training course on traditional Chinese medicine health preservation during pregnancy and perinatal period for maternity nurses

| First-level indicators | Secondary indicators | Third-level indicators | Score of importance | | | | | | Suggestions for modification | Reference credit hours |
| --- | --- | --- | --- | --- | --- | --- | --- | --- | --- | --- |
| 5 | 4 | 3 | 2 | 1 |  | |
| 1. Basic professional knowledge | A1. Introduction of TCM 's participation in maternal health care and fetal care | A1.1 Historical precipitation of traditional Chinese medicine health and fetal care |  |  |  |  |  |  | |  |
| A1.2 Principles of the concept of health preservation and fetal care during pregnancy and childbirth in traditional Chinese Medicine |  |  |  |  |  |  | |  |
| A1.3 Modern research and development of traditional Chinese medicine on health preservation and foetus raising |  |  |  |  |  |  | |  |
| Suggested items (please give importance rating) : | | | | | | | | | |
| A2. Basic theory of traditional Chinese medicine | A2.1 Introduction to basic theories of traditional Chinese medicine |  |  |  |  |  |  | |  |
| A2.2 Yin-yang theory |  |  |  |  |  |  | |  |
| A2.3 Five elements theory |  |  |  |  |  |  | |  |
| A2.4 Zang–xiang theory |  |  |  |  |  |  | |  |
| A2.5 Essence, qi, blood and body fluid |  |  |  |  |  |  | |  |
| A2.6 Eight extraordinary meridians |  |  |  |  |  |  | |  |
| Suggested items (please give importance rating) : | | | | | | | | | |
| A3. Dialectical nursing | A3.1 Introduction to dialectical nursing |  |  |  |  |  |  | |  |
| A3.2 Pattern differentiation by the eight principles |  |  |  |  |  |  | |  |
| A3.3 Pattern differentiation of qi, blood and bodily-  fluids |  |  |  |  |  |  | |  |
| A3.4 Pattern differentiation of zang–fu organs |  |  |  |  |  |  | |  |
| A3.5 Pattern differentiation of body constitution |  |  |  |  |  |  | |  |
| A3.6 Other differentiation methods |  |  |  |  |  |  | |  |
| Suggested items (please give importance rating) : | | | | | | | | | |
| A4. The quality control of TCM technology and management | A4.1 TCM technical operation specification and standardization |  |  |  |  |  |  | |  |
| A4.2 Patient safety and risk management |  |  |  |  |  |  | |  |
| A4.3 TCM technical archives management and informatization |  |  |  |  |  |  | |  |
| Suggested items (please give importance rating) : | | | | | | | | | |
| B. Professional core knowledge | B1. Body Nurturing for Conception | B1.1 Introduction to body nurturing for conception |  |  |  |  |  |  | |  |
| B1.2 Adjust the menstruation |  |  |  |  |  |  | |  |
| B1.3 Regulation of body constitution |  |  |  |  |  |  | |  |
| B1.4 Regulating reproductive fluids |  |  |  |  |  |  | |  |
| Suggested items (please give importance rating) : | | | | | | | | | |
| B2. Pregnancy | B2.1 First trimester |  |  |  |  |  |  | |  |
| B2.2 Second trimester |  |  |  |  |  |  | |  |
| B2.3 Third trimester |  |  |  |  |  |  | |  |
| B2.4 Fetal education |  |  |  |  |  |  | |  |
| Suggested items (please give importance rating) : | | | | | | | | | |
| B3. Delivery | B3.1 Introduction to production |  |  |  |  |  |  | |  |
| B3.2 Onset of labor |  |  |  |  |  |  | |  |
| B3.3 Hasten childbirth |  |  |  |  |  |  | |  |
| B3.4 Habitual miscarriage |  |  |  |  |  |  | |  |
| Suggested items (please give importance rating) : | | | | | | | | | |
| B4. Postpartum | B4.1 Introduction to postpartum |  |  |  |  |  |  | |  |
| B4.2 Postpartum emotional harmony maintenance |  |  |  |  |  |  | |  |
| B4.3 Postpartum dietary regulation |  |  |  |  |  |  | |  |
| B4.4 Postpartum lifestyle adjustment |  |  |  |  |  |  | |  |
| B4.5 Postpartum exercise adjustment |  |  |  |  |  |  | |  |
| B4.6 Postpartum lactation regulation |  |  |  |  |  |  | |  |
| Suggested items (please give importance rating) : | | | | | | | | | |
| B5. The common symptoms of pregnancy | B5.1 Pregnancy vomiting |  |  |  |  |  |  | |  |
| B5.2 Cough during pregnancy |  |  |  |  |  |  | |  |
| B5.3 Threatened abortion |  |  |  |  |  |  | |  |
| B5.4 Impaired urination |  |  |  |  |  |  | |  |
| B5.5 Riyue Buzu* |  |  |  |  |  |  | |  |
| B5.6 Eclampsia of pregnancy |  |  |  |  |  |  | |  |
| B5.7 Oedema during pregnancy |  |  |  |  |  |  | |  |
| B5.8 Diabetes during  pregnancy |  |  |  |  |  |  | |  |
| Suggested items (please give importance rating) : | | | | | | | | | |
| B6. Dystocia | B6.1 Introduction to postpartum dystocia |  |  |  |  |  |  | |  |
| B6.2 Oblique delivery |  |  |  |  |  |  | |  |
| B6.3 Backward delivery |  |  |  |  |  |  | |  |
| B6.4 Hindered delivery |  |  |  |  |  |  | |  |
| B6.5 Crosswise delivery |  |  |  |  |  |  | |  |
| B6.6 Failure of pelvic bones to dilate |  |  |  |  |  |  | |  |
| Suggested items (please give importance rating) : | | | | | | | | | |
| B7. Postpartum symptoms | B7.1 Overview of Postpartum Symptoms and Conditions |  |  |  |  |  |  | |  |
| B7.2 Retained placenta |  |  |  |  |  |  | |  |
| B7.3 Postpartum fainting |  |  |  |  |  |  | |  |
| B7.4 Persistent lochia discharge |  |  |  |  |  |  | |  |
| B7.5 Chanhou Erzhen（Postpartum Uterine Contraction Pain） |  |  |  |  |  |  | |  |
| B7.6 Postpartum oligogalactia |  |  |  |  |  |  | |  |
| B7.7 Acute mastitis |  |  |  |  |  |  | |  |
| Suggested items (please give importance rating) : | | | | | | | | | |
| B8. Application and evaluation of TCM nursing programs in obstetrics | B8.1 The basic framework and content of TCM nursing program in obstetrics |  |  |  |  |  |  | |  |
| B8.2 Clinical application of TCM nursing scheme in obstetrics |  |  |  |  |  |  | |  |
| Suggested items (please give importance rating) : | | | | | | | | | |
| C. Professional skill | C1. Application status and prospect of appropriate technology of traditional Chinese medicine in obstetrics | C1.1 Clinical application status of appropriate techniques of traditional Chinese medicine in obstetrics |  |  |  |  |  |  | |  |
| C1.2 Scientific research and evidence support of TCM appropriate techniques in obstetrics |  |  |  |  |  |  | |  |
| Suggested items (please give importance rating) : | | | | | | | | | |
| C2. Commonly used traditional Chinese medicine technology | C2.1 Acupoint massage Techniques |  |  |  |  |  |  | |  |
| C2.2 Acupoint application technique |  |  |  |  |  |  | |  |
| C2.3 Auriculotherapy |  |  |  |  |  |  | |  |
| C2.4 Acupoint injection technique |  |  |  |  |  |  | |  |
| C2.5 Wrist-ankle acupuncture |  |  |  |  |  |  | |  |
| C2.6 Suspension moxibustion |  |  |  |  |  |  | |  |
| C2.7 Indirect moxibustion |  |  |  |  |  |  | |  |
| C2.8 Cupping Therapy |  |  |  |  |  |  | |  |
| C2.9 Scraping therapy |  |  |  |  |  |  | |  |
| C2.10Traditional Chinese Medicine soaking bath |  |  |  |  |  |  | |  |
| C2.11 Traditional Chinese Medicine Fumigation Treatment |  |  |  |  |  |  | |  |
| C2.12 Traditional Chinese Medicine hot compress |  |  |  |  |  |  | |  |
| C2.13 Umbilical therapy |  |  |  |  |  |  | |  |
| C2.14 Five element music therapy |  |  |  |  |  |  | |  |
| C2.15 Plantar reflexology |  |  |  |  |  |  | |  |
| C2.16.Catgut-embedding therapy |  |  |  |  |  |  | |  |
| Suggested items (please give importance rating) : | | | | | | | | | |
| C3. Thinking and skills training | C3.1 Case Practice Workshop - Body Nurturing for Conception |  |  |  |  |  |  | |  |
| C3.2 Case Practice Workshop - Pregnancy conditioning |  |  |  |  |  |  | |  |
| C3.3 Case Practice Workshop - Fetal education |  |  |  |  |  |  | |  |
| C3.4 Case Practice Workshop – Delivery and dystocia |  |  |  |  |  |  | |  |
| C3.5 Case Practice Workshop - Postpartum recovery and management of postpartum complications |  |  |  |  |  |  | |  |
| Suggested items (please give importance rating) : | | | | | | | | | |
| D. Professional development | D1. Professional role | D1.1 The responsibilities of maternity nurses in maternal |  |  |  |  |  |  | |  |
| Suggested items (please give importance rating) : | | | | | | | | | |
| D2. Humanistic quality | D2.1 Philosophical thoughts of traditional Chinese Medicine |  |  |  |  |  |  | |  |
| D2.2 The combination of traditional Chinese medicine culture and modern medical treatment |  |  |  |  |  |  | |  |
| Suggested items (please give importance rating) : | | | | | | | | | |
| D3. Legal ethics | D3.1 The legal framework of TCM maternal health care and fetal care |  |  |  |  |  |  | |  |
| D3.2 Application cases of legal ethics in TCM maternal health care and fetal care |  |  |  |  |  |  | |  |
| D3.3 Legal and ethical risk identification and coping strategies |  |  |  |  |  |  | |  |
| Suggested items (please give importance rating) : | | | | | | | | | |

For Table S1.3, if you have any other comments or suggestions, please fill in here:

__________________________________________________________________________________________________________________________________________

**Part Ⅲ Expert authority questionnaire**

**Note:** Please type "√" in the corresponding space according to the situation.

Experts' familiarity with the consultation content

| Degree of familiarity | Very familiar | Familiar | General familiarity | Not very familiar | Completely not familiar |
| --- | --- | --- | --- | --- | --- |
| Self-assessment |  |  |  |  |  |

Expert judgment basis and influence degree on consultation content

| The judgment basis for the relevance of expert evaluation indicators | Basis of judgment | Degree of impact |
| --- | --- | --- |
| Practical experience | □ Large □ Medium □ Small |
| Theoretical analysis | □ Large □ Medium □ Small |
| Domestic and foreign references | □ Large □ Medium □ Small |
| Subjective feeling | □ Large □ Medium □ Small |

If you have any other suggestions or comments on this study, please fill in the following:

__________________________________________________________________________________________________________________________________________

**Supplementary Material 2: Consultation result of traditional Chinese medicine health preservation during pregnancy and perinatal period training course for maternity nurses**

| Course module & course contents | Hours | Teaching method | Rating of importance | Coefficient of variation | Approval rate(%) | Weighting target |
| --- | --- | --- | --- | --- | --- | --- |
| A Basic professional knowledge |  |  | 4.94±0.25 | 0.05 | 100 | 0.260 |
| A1. Basic theory of traditional Chinese medicine |  |  | 4.81±0.40 | 0.08 | 100 | 0.069 |
| A1.1 Introduction to basic theories of traditional Chinese medicine | 1 h | Lectures | 4.75±0.45 | 0.09 | 100 | 0.013 |
| A1.2 Yin-yang theory | 1 h | Lectures | 4.94±0.25 | 0.05 | 88.5 | 0.013 |
| A1.3. Five elements theory | 1 h | Lectures | 5.00±0.00 | 0.00 | 100 | 0.014 |
| A1.4. Zang–xiang theory | 1 h | Lectures | 5.00±0.00 | 0.00 | 100 | 0.014 |
| A1.5. Essence, qi, blood and body fluid | 1 h | Lectures | 5.00±0.00 | 0.00 | 88.5 | 0.014 |
| A1.6 Eight extraordinary meridians | 1 h | Lectures | 4.63±0.50 | 0.11 | 93.8 | 0.013 |
| A2. Dialectical nursing |  |  | 4.81±0.40 | 0.08 | 100 | 0.069 |
| A2.1 Introduction to dialectical nursing |  | Lectures | 4.75±0.45 | 0.09 | 100 | 0.013 |
| A2.2 Pattern differentiation by the eight principles | 1 h | Lectures and case analysis | 4.88±0.34 | 0.07 | 100 | 0.013 |
| A2.3 Pattern differentiation of qi, blood and bodily-  fluids | 1 h | Lectures and case analysis | 4.88±0.34 | 0.07 | 100 | 0.013 |
| A2.4. Pattern differentiation of zang–fu organs | 1 h | Lectures and case analysis | 4.94±0.25 | 0.05 | 100 | 0.013 |
| A2.5. Pattern differentiation of body constitution | 1 h | Lectures and case analysis | 4.94±0.25 | 0.05 | 100 | 0.013 |
| A2.6. Other differentiation methods | 1 h | Lectures and case analysis | 4.50±0.52 | 0.11 | 100 | 0.012 |
| B Professional core knowledge |  |  | 4.94±0.25 | 0.09 | 100 | 0.260 |
| B1. Body Nurturing for Conception |  |  | 4.37±0.72 | 0.16 | 100 | 0.063 |
| B1.1 Introduction to body nurturing for conception | 1 h | Lectures and case analysis | 4.81±0.40 | 0.08 | 100 | 0.013 |
| B1.2 Harmonizing menstrual cycle | 1 h | Lectures and case analysis | 4.81±0.40 | 0.08 | 93.8 | 0.013 |
| B1.3 Regulating reproductive fluids | 1 h | Lectures and case analysis | 4.81±0.40 | 0.08 | 100 | 0.013 |
| B1.4 Infertility management and nursing with TCM | 1 h | Lectures and case analysis | 4.81±0.40 | 0.08 | 100 | 0.013 |
| B2. Pregnancy |  |  | 4.37±0.62 | 0.14 | 100 | 0.063 |
| B2.1 First trimester | 1 h | Lectures and case analysis | 4.88±0.34 | 0.07 | 100 | 0.013 |
| B2.2 Second trimester | 1 h | Lectures and case analysis | 4.88±0.34 | 0.07 | 100 | 0.013 |
| B2.3 Third trimester | 1 h | Lectures and case analysis | 4.88±0.34 | 0.07 | 100 | 0.013 |
| B2.4 Fetal education | 1 h | Lectures and case analysis | 4.88±0.34 | 0.07 | 100 | 0.013 |
| B3. Delivery |  |  | 4.75±0.45 | 0.09 | 100 | 0.068 |
| B3.1 Introduction to production | 1 h | Lectures | 4.44±0.63 | 0.14 | 100 | 0.012 |
| B3.2 Onset of labor | 1 h | Lectures and case analysis | 4.69±0.48 | 0.10 | 100 | 0.013 |
| B3.3 Hasten childbirth | 1 h | Lectures and case analysis | 4.69±0.48 | 0.10 | 100 | 0.013 |
| B3.4 Habitual miscarriage | 1 h | Lectures and case analysis | 4.50±0.52 | 0.11 | 100 | 0.012 |
| B4. Postpartum |  |  | 4.81±0.40 | 0.08 | 100 | 0.069 |
| B4.1 Introduction to postpartum | 1 h | Lectures | 4.44±0.51 | 0.12 | 100 | 0.012 |
| B4.2 Postpartum emotional harmony maintenance | 1 h | Lectures and case analysis | 4.50±0.52 | 0.11 | 100 | 0.012 |
| B4.3 Postpartum dietary regulation | 1 h | Lectures and case analysis | 5.00±0.00 | 0.00 | 100 | 0.014 |
| B4.4 Postpartum lifestyle adjustment | 1 h | Lectures and case analysis | 4.94±0.25 | 0.05 | 100 | 0.013 |
| B4.5 Postpartum exercise adjustment | 1 h | Lectures and case analysis | 4.94±0.25 | 0.05 | 100 | 0.013 |
| B4.6 Postpartum lactation regulation | 1 h | Lectures and case analysis | 5.00±0.00 | 0.00 | 100 | 0.014 |
| B5. The common symptoms of pregnancy |  |  | 4.88±0.34 | 0.07 | 100 | 0.070 |
| B5.1 Overview of Common Symptoms During Pregnancy | 1 h | Lectures | 4.50±0.52 | 0.11 | 93.8 | 0.012 |
| B5.2 Pregnancy vomiting | 1 h | Lectures and case analysis | 4.94±0.25 | 0.05 | 100 | 0.013 |
| B5.3 Cough during pregnancy | 1 h | Lectures and case analysis | 4.94±0.25 | 0.05 | 100 | 0.013 |
| B5.4 Threatened abortion | 1 h | Lectures and case analysis | 4.88±0.34 | 0.07 | 100 | 0.013 |
| B5.5 Impaired urination | 1 h | Lectures and case analysis | 4.88±0.34 | 0.07 | 100 | 0.013 |
| B5.6 Riyue Buzu* | 1 h | Lectures and case analysis | 5.00±0.00 | 0.00 | 100 | 0.014 |
| B5.7 Eclampsia of pregnancy | 1 h | Lectures and case analysis | 4.94±0.25 | 0.05 | 100 | 0.013 |
| B5.8 Oedema during pregnancy | 1 h | Lectures and case analysis | 4.88±0.34 | 0.07 | 100 | 0.013 |
| B5.9 Diabetes during  pregnancy | 1 h | Lectures and case analysis | 4.81±0.40 | 0.08 | 100 | 0.013 |
| B6. Dystocia |  |  | 4.63±0.50 | 0.11 | 100 | 0.067 |
| B6.1 Diagnosis and Prevention of dystocia | 1 h | Lectures and case analysis | 4.62±0.50 | 0.11 | 100 | 0.013 |
| B6.2 TCM treatment for dystocia | 1 h | Lectures and case analysis | 4.81±0.40 | 0.08 | 100 | 0.013 |
| B7. Postpartum |  |  | 4.69±0.48 | 0.10 | 100 | 0.067 |
| B7.1 Overview of Postpartum Symptoms and Conditions | 1 h | Lectures | 4.75±0.45 | 0.09 | 100 | 0.013 |
| B7.2 Retained placenta | 1 h | Lectures and case analysis | 4.94±0.25 | 0.05 | 100 | 0.013 |
| B7.3 Postpartum fainting | 1 h | Lectures and case analysis | 4.81±0.40 | 0.08 | 100 | 0.013 |
| B7.4 Persistent lochia discharge | 1 h | Lectures and case analysis | 5.00±0.00 | 0.00 | 100 | 0.014 |
| B7.5Chanhou Erzhen*（ Postpartum Uterine Contraction Pain ） | 1 h | Lectures and case analysis | 4.63±0.50 | 0.11 | 100 | 0.013 |
| B7.6 Postpartum oligogalactia | 1 h | Lectures and case analysis | 4.94±0.25 | 0.05 | 100 | 0.013 |
| B7.7 Acute mastitis | 1 h | Lectures and case analysis | 4.81±0.40 | 0.08 | 100 | 0.013 |
| C Professional skill |  |  | 4.75±0.45 | 0.09 | 100 | 0.250 |
| C1.Application status and prospect of appropriate technology of traditional Chinese medicine in obstetrics |  |  | 4.69±0.48 | 0.10 | 100 | 0.067 |
| C1.1Clinical application status of appropriate techniques of traditional Chinese medicine in obstetrics | 1 h | Lectures and case analysis | 4.56±0.51 | 0.11 | 100 | 0.012 |
| C1.2 Scientific research and evidence support of TCM appropriate techniques in obstetrics | 1 h | Lectures and case analysis | 4.81±0.40 | 0.08 | 100 | 0.013 |
| C2. Commonly used traditional Chinese medicine technology |  |  | 4.88±0.34 | 0.07 | 100 | 0.070 |
| C2.1 Acupoint massage Techniques | 1 h | Workshop and clinical practice | 4.88±0.34 | 0.07 | 100 | 0.013 |
| C2.2 Acupoint application technique | 1 h | Workshop and clinical practice | 4.88±0.34 | 0.07 | 100 | 0.013 |
| C2.3 Auriculotherapy | 1 h | Workshop and clinical practice | 4.94±0.25 | 0.05 | 100 | 0.013 |
| C2.4 Acupoint injection technique | 1 h | Workshop and clinical practice | 4.38±0.62 | 0.14 | 100 | 0.012 |
| C2.5 Wrist-ankle acupuncture | 1 h | Workshop and clinical practice | 4.50±0.52 | 0.11 | 100 | 0.012 |
| C2.6 Suspension moxibustion | 1 h | Workshop and clinical practice | 4.69±0.48 | 0.10 | 100 | 0.013 |
| C2.7 Indirect moxibustion | 1 h | Workshop and clinical practice | 4.63±0.50 | 0.11 | 100 | 0.013 |
| C2.8 Cupping Therapy | 1 h | Workshop and clinical practice | 4.50±0.52 | 0.11 | 100 | 0.012 |
| C2.9 Scraping therapy | 1 h | Workshop and clinical practice | 4.69±0.48 | 0.10 | 94.8 | 0.013 |
| C2.10Traditional Chinese Medicine soaking bath | 1 h | Workshop and clinical practice | 4.75±0.45 | 0.09 | 100 | 0.013 |
| C2.11 Traditional Chinese Medicine Fumigation Treatment | 1 h | Workshop and clinical practice | 4.75±0.45 | 0.09 | 100 | 0.013 |
| C2.12 Traditional Chinese Medicine hot compress | 1 h | Workshop and clinical practice | 4.88±0.34 | 0.07 | 100 | 0.013 |
| C2.13 Umbilical therapy | 1 h | Workshop and clinical practice | 4.50±0.52 | 0.11 | 100 | 0.012 |
| C2.14 Five element music therapy | 1 h | Workshop and clinical practice | 4.75±0.45 | 0.09 | 100 | 0.013 |
| C2.15 Plantar reflexology | 1 h | Workshop and clinical practice | 4.62±0.50 | 0.11 | 100 | 0.013 |
| C2.16.Catgut-embedding therapy | 1 h | Workshop and clinical practice | 4.44±0.51 | 0.12 | 100 | 0.012 |
| C3. Thinking and skills training |  |  | 4.62±0.50 | 0.11 | 100 | 0.066 |
| C3.1 Case Practice Workshop - Body Nurturing for Conception and fetal education | 2h | Case study, group discussion, role play, clinical practice, | 5.00±0.00 | 0.00 | 100 | 0.014 |
| C3.2 Case Practice Workshop - Pregnancy conditioning | 2h | Case study, group discussion, role play, clinical practice, | 4.81±0.40 | 0.08 | 100 | 0.013 |
| C3.3 Case Practice Workshop - The common symptoms of pregnancy | 2h | Case study, group discussion, role play, clinical practice, | 4.94±0.25 | 0.05 | 100 | 0.013 |
| C3.4 Case Practice Workshop – Delivery and dystocia | 2h | Case study, group discussion, role play, clinical practice | 4.81±0.40 | 0.08 | 100 | 0.013 |
| C3.5Case Practice Workshop - Postpartum recovery and management of postpartum complications | 2h | Case study, group discussion, role play, clinical practice | 4.94±0.25 | 0.05 | 100 | 0.013 |
| D. Professional development |  |  | 4.37±0.72 | 0.16 | 100 | 0.230 |
| D1. Professional role |  |  | 4.37±0.50 | 0.11 | 100 | 0.063 |
| D1.1 The responsibilities of maternity healthcare nurses in maternal | 1h | Seminar | 4.88±0.34 | 0.07 | 100 | 0.013 |
| D1.2. Consulting and communication skills | 1h | Seminar | 5.00±0.00 | 0.00 | 100 | 0.014 |
| D2. Humanistic quality |  |  | 4.56±0.51 | 0.11 | 100 | 0.066 |
| D2.1 Philosophical thoughts of traditional Chinese Medicine | 1h | Seminar | 4.81±0.40 | 0.08 | 100 | 0.013 |
| D2.2 The combination of traditional Chinese medicine culture and modern medical treatment | 1h | Seminar | 4.94±0.25 | 0.05 | 100 | 0.013 |
| D3. Relevant policies and regulations |  |  | 4.25±0.58 | 0.14 | 100 | 0.061 |
| D3.1 The application of TCM in maternal and child health care | 1h | Seminar | 4.81±0.40 | 0.08 | 100 | 0.013 |
| D3.2 Legal and ethical risk identification and coping strategies | 1h | Seminar | 4.44±0.51 | 0.12 | 100 | 0.012 |
